# Supplementary material for: Use of a Small Animal Radiation Research Platform (SARRP) facilitates analysis of systemic versus targeted radiation effects in the mouse ovary
Source: Springer Nature journal article supplement (doi:10.1186/s13048-018-0442-8), 2018-08-30

## Additional File 2

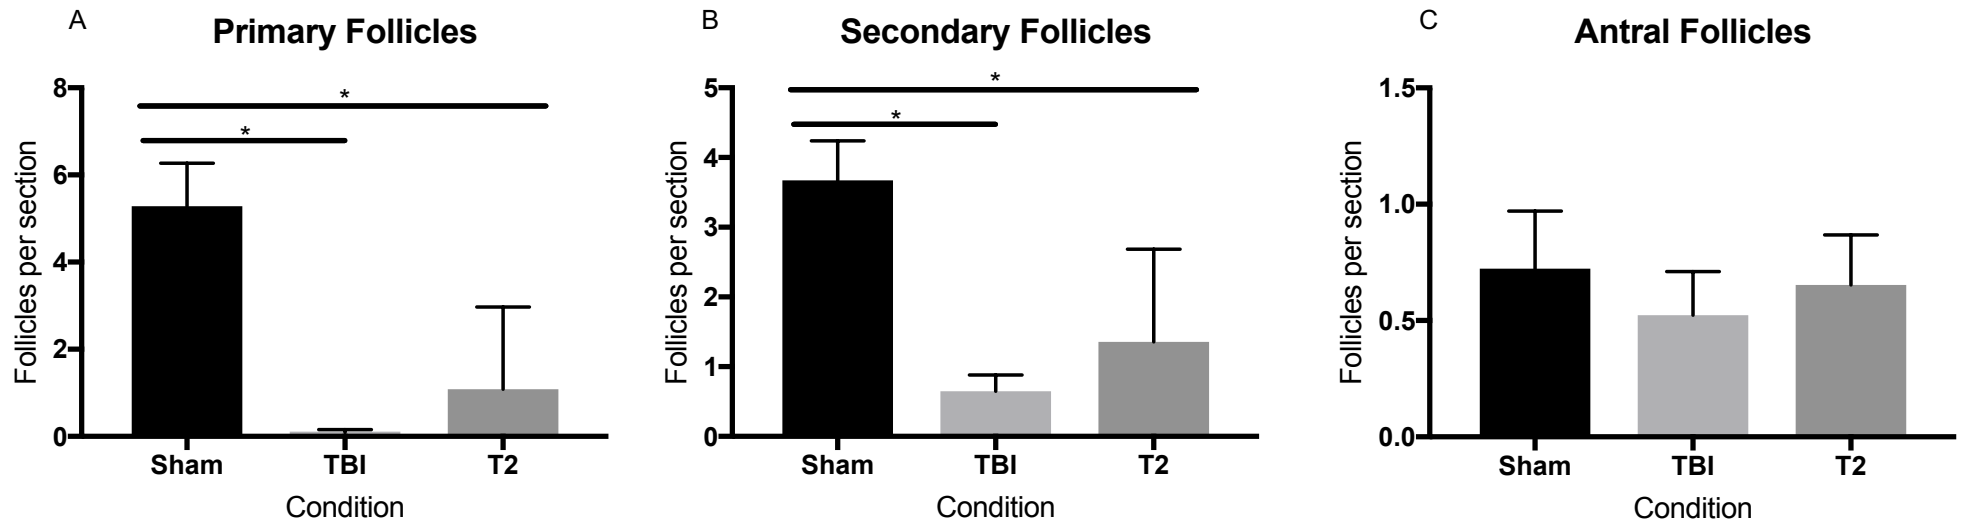

Supplement: MOESM2 [file 16086336]
